# Supplementary material for: Genetic Determination of a Cryptic Species in the Littoraria Genus With Whole‐Genome Molecular Resolution
Source: PubMed Central journal article supplement (PMC11631568; doi:10.1002/ece3.70715), 2024-12-10
Supplement: ECE3-14-e70715-s002.pdf [file ECE3-14-e70715-s002.pdf]

Table S1. Summary of diversity indices based on 7,354 neutral SNPs from GBS data for three snail species

| <b>Specie</b>              | <b>Private alleles (N)</b> | <b>Observed heterozygosity (<math>H_o</math>)</b> | <b>Expected heterozygosity (<math>H_e</math>)</b> | <b>Nucleotide diversity (<math>\pi</math>)</b> | <b>Inbreeding coefficient (<math>F_{is}</math>)</b> | <b>Polymorphic loci (%)</b> |
|----------------------------|----------------------------|---------------------------------------------------|---------------------------------------------------|------------------------------------------------|-----------------------------------------------------|-----------------------------|
| <i>L. flammea</i>          | 872                        | 0.122±0.002                                       | 0.149±0.002                                       | 0.153±0.002                                    | 0.126±0.023                                         | 64.67                       |
| <i>L. aff. melanostoma</i> | 1                          | 0.164±0.002                                       | 0.183±0.002                                       | 0.191±0.002                                    | 0.128±0.022                                         | 77.17                       |
| <i>L. melanostoma</i>      | 125                        | 0.163±0.002                                       | 0.190±0.002                                       | 0.194±0.002                                    | 0.089±0.020                                         | 83.77                       |

Table S2.  $f_3$  statistics testing for hybridization between populations.

| <b>Source 1</b>       | <b>Source 2</b>       | <b>Target</b>              | <b><math>f_3</math></b> | <b>SE</b> | <b>Z</b> |
|-----------------------|-----------------------|----------------------------|-------------------------|-----------|----------|
| <i>L. flammea</i>     | <i>L. melanostoma</i> | <i>L. aff. melanostoma</i> | -0.00155                | 0.00871   | -2.09    |
| <i>L. flammea</i>     | <i>L. flammea</i>     | <i>L. aff. melanostoma</i> | 0.0628                  | 0.000743  | 0.779    |
| <i>L. melanostoma</i> | <i>L. melanostoma</i> | <i>L. aff. melanostoma</i> | 0.00222                 | 0.000242  | 0.0569   |

Note: SE represents the standard error. Z represents the Z-score value.

Table S3. Overview of genes with good annotation and associated outlier SNPs

| Outlier SNP ID   | Annotation                              | REF | ALT | RD   | RD | RD   | XM   | XM | XM   | YQ   | YQ | YQ   |
|------------------|-----------------------------------------|-----|-----|------|----|------|------|----|------|------|----|------|
|                  |                                         |     |     | Ho_1 | He | Ho_2 | Ho_1 | He | Ho_2 | Ho_1 | He | Ho_2 |
| contig103879_344 | TRUB2                                   | A   | G   | 0    | 0  | 22   | 21   | 0  | 0    | 10   | 0  | 0    |
| contig103879_367 | TRUB2                                   | A   | T   | 0    | 0  | 22   | 21   | 0  | 0    | 10   | 0  | 0    |
| contig103879_64  | TRUB2                                   | T   | C   | 0    | 0  | 22   | 23   | 0  | 0    | 13   | 0  | 0    |
| contig106299_110 | Cytoplasmic Linker Associated Protein 1 | G   | A   | 0    | 0  | 23   | 26   | 0  | 0    | 12   | 0  | 0    |
| contig106299_128 | Cytoplasmic Linker Associated Protein 1 | C   | A   | 0    | 0  | 23   | 26   | 0  | 0    | 12   | 0  | 0    |
| contig113869_173 | B cell affinity maturation              | A   | T   | 0    | 0  | 17   | 24   | 0  | 0    | 14   | 0  | 0    |
| contig11746_118  | HSPA5                                   | T   | C   | 0    | 0  | 24   | 25   | 0  | 0    | 13   | 0  | 0    |
| contig11746_97   | HSPA5                                   | A   | G   | 0    | 0  | 24   | 26   | 0  | 0    | 13   | 0  | 0    |
| contig14669_147  | Mediator Complex Subunit 15             | A   | G   | 0    | 0  | 17   | 25   | 0  | 0    | 14   | 0  | 0    |
| contig172959_195 | metalloendopeptidase activity           | A   | T   | 0    | 0  | 21   | 24   | 0  | 0    | 12   | 0  | 0    |
| contig172959_202 | metalloendopeptidase activity           | T   | A   | 0    | 0  | 21   | 23   | 0  | 0    | 13   | 0  | 0    |
| contig18442_40   | MMS19                                   | C   | T   | 0    | 0  | 20   | 26   | 0  | 0    | 12   | 0  | 0    |
| contig190918_8   | COPI Coat Complex Subunit Gamma 1       | C   | T   | 0    | 0  | 19   | 23   | 0  | 0    | 9    | 0  | 2    |
| contig19413_270  | Zinc finger protein                     | C   | A   | 0    | 0  | 24   | 25   | 0  | 0    | 14   | 0  | 0    |
| contig29465_186  | MTRR                                    | G   | A   | 0    | 0  | 24   | 26   | 0  | 0    | 14   | 0  | 0    |
| contig29465_208  | MTRR                                    | A   | G   | 0    | 0  | 24   | 26   | 0  | 0    | 14   | 0  | 0    |
| contig32824_8    | PDCD6IP                                 | A   | G   | 0    | 0  | 20   | 26   | 0  | 0    | 11   | 0  | 0    |
| contig38019_158  | UTP23                                   | A   | G   | 0    | 0  | 23   | 26   | 0  | 0    | 13   | 0  | 0    |
| contig38019_21   | UTP23                                   | A   | C   | 0    | 0  | 23   | 26   | 0  | 0    | 13   | 0  | 0    |
| contig38871_315  | Protein Kinase C Delta                  | A   | G   | 0    | 0  | 22   | 22   | 0  | 0    | 11   | 0  | 0    |
| contig38871_388  | Protein Kinase C Delta                  | T   | C   | 0    | 0  | 22   | 22   | 0  | 0    | 11   | 0  | 0    |
| contig39991_101  | Rab GTPase binding                      | A   | C   | 0    | 0  | 19   | 22   | 0  | 0    | 13   | 0  | 1    |
| contig39991_165  | Rab GTPase binding                      | G   | A   | 0    | 0  | 19   | 22   | 0  | 0    | 13   | 0  | 1    |
| contig39991_167  | Rab GTPase binding                      | A   | T   | 0    | 0  | 19   | 22   | 0  | 0    | 13   | 0  | 1    |
| contig39991_198  | Rab GTPase binding                      | T   | G   | 0    | 0  | 19   | 19   | 1  | 0    | 6    | 4  | 4    |

|                  |                                              |   |   |    |   |    |    |   |   |    |   |   |
|------------------|----------------------------------------------|---|---|----|---|----|----|---|---|----|---|---|
| contig39991_216  | Rab GTPase binding                           | C | T | 1  | 6 | 12 | 22 | 0 | 0 | 13 | 0 | 0 |
| contig40268_147  | ERCC Excision Repair 5, Endonuclease         | T | C | 0  | 0 | 20 | 23 | 0 | 0 | 11 | 0 | 0 |
| contig40619_277  | GPI-anchor transamidase activity             | A | G | 0  | 0 | 20 | 25 | 0 | 0 | 11 | 0 | 0 |
| contig41477_76   | EF-Hand Calcium Binding Domain 5             | C | T | 0  | 0 | 23 | 23 | 0 | 0 | 15 | 0 | 0 |
| contig44907_130  | Solute Carrier Family 25 Member 12           | C | A | 0  | 0 | 21 | 25 | 0 | 0 | 9  | 0 | 0 |
| contig44907_158  | Solute Carrier Family 25 Member 12           | C | A | 0  | 0 | 21 | 25 | 0 | 0 | 9  | 0 | 0 |
| contig46054_129  | Protein of unknown function (DUF3253)        | G | A | 0  | 0 | 22 | 25 | 0 | 0 | 14 | 0 | 0 |
| contig46054_86   | Protein of unknown function (DUF3253)        | T | C | 0  | 0 | 23 | 25 | 0 | 0 | 14 | 0 | 0 |
| contig47042_59   | ECSIT Signaling Integrator                   | T | C | 0  | 0 | 23 | 25 | 0 | 0 | 12 | 0 | 0 |
| contig47042_86   | ECSIT Signaling Integrator                   | C | T | 0  | 0 | 23 | 25 | 0 | 0 | 12 | 0 | 0 |
| contig59015_53   | Zinc finger, C2H2 type                       | T | C | 0  | 0 | 23 | 26 | 0 | 0 | 11 | 0 | 0 |
| contig67912_133  | Oxysterol Binding Protein Like 8             | G | C | 0  | 0 | 21 | 22 | 0 | 0 | 11 | 0 | 0 |
| contig74496_110  | PKD1L1                                       | G | A | 0  | 0 | 20 | 24 | 0 | 0 | 13 | 0 | 0 |
| contig74496_152  | PKD1L1                                       | G | A | 0  | 0 | 23 | 24 | 0 | 0 | 13 | 0 | 0 |
| contig74496_22   | PKD1L1                                       | G | A | 0  | 0 | 23 | 24 | 0 | 0 | 13 | 0 | 0 |
| contig74496_46   | PKD1L1                                       | G | A | 0  | 0 | 23 | 24 | 0 | 0 | 13 | 0 | 0 |
| contig74496_71   | PKD1L1                                       | G | A | 0  | 0 | 23 | 24 | 0 | 0 | 13 | 0 | 0 |
| contig76519_46   | Transmembrane Protein 245                    | G | A | 0  | 0 | 22 | 25 | 0 | 0 | 10 | 0 | 0 |
| contig7783_160   | RNA secondary structure unwinding            | C | A | 0  | 0 | 21 | 25 | 0 | 0 | 13 | 0 | 0 |
| contig78627_5    | fasciculation of sensory neuron axon         | C | T | 0  | 0 | 21 | 24 | 0 | 0 | 14 | 0 | 0 |
| contig82241_356  | Mediator Complex Subunit 15                  | C | T | 0  | 0 | 24 | 26 | 0 | 0 | 15 | 0 | 0 |
| contig82241_89   | Mediator Complex Subunit 15                  | A | G | 0  | 0 | 23 | 26 | 0 | 0 | 15 | 0 | 0 |
| contig86224_61   | Pantothenate Kinase 4                        | C | T | 0  | 0 | 22 | 26 | 0 | 0 | 11 | 0 | 0 |
| contig86729_17   | von Willebrand factor D and EGF              | C | T | 19 | 2 | 2  | 21 | 0 | 0 | 9  | 0 | 0 |
| contig9017_109   | Source PGD                                   | C | T | 0  | 0 | 23 | 25 | 1 | 0 | 9  | 0 | 0 |
| contig91863_182  | Serine threonine-protein kinase tousled-like | T | A | 0  | 0 | 20 | 25 | 0 | 0 | 10 | 0 | 0 |
| contig919763_111 | Beta-lactamase                               | G | A | 0  | 0 | 14 | 26 | 0 | 0 | 13 | 0 | 0 |
| contig94066_34   | atypical protein kinase C                    | T | C | 0  | 0 | 23 | 24 | 0 | 0 | 7  | 0 | 0 |
| contig94066_59   | atypical protein kinase C                    | G | A | 0  | 0 | 23 | 24 | 0 | 0 | 7  | 0 | 0 |
| contig94770_124  | DDB1 and CUL4 associated factor 4            | A | T | 0  | 0 | 23 | 24 | 0 | 0 | 12 | 0 | 0 |

|                 |                                     |   |   |   |   |    |    |   |   |    |   |   |
|-----------------|-------------------------------------|---|---|---|---|----|----|---|---|----|---|---|
| contig94770_34  | DDB1 and CUL4 associated factor 4   | T | C | 0 | 0 | 23 | 24 | 0 | 0 | 12 | 0 | 0 |
| contig95735_234 | G-protein coupled receptor activity | G | A | 0 | 0 | 22 | 21 | 0 | 0 | 12 | 0 | 0 |

---

Note: Ho represents the Homozygote. He represents the Heterozygote.
